# Supplementary material for: Association between medial gastrocnemius muscle-tendon unit architecture and ankle dorsiflexion range of motion with and without consideration of slack angle
Source: PLoS One. 2021 Mar 5;16(3):e0248125. doi: 10.1371/journal.pone.0248125 (PMC7935265; doi:10.1371/journal.pone.0248125)
Supplement: S1 Table — (XLSX) [file pone.0248125.s001.xlsx]

## Sheet: Data set
	Subject ID				A	B	C	D	E	F	G	H	I	J	K	L	M	N	O	P	Q
	Physical characteristics	Age		(yr)	20	22	30	26	22	24	23	23	22	23	21	21	19	25	19	19	23
		Height		(cm)	174	168	177	170	186	172	172	165	170	179	174	171	175	178	169	173	181
		Weight		(kg)	77	61	58	69	78	68	68	68	62	67	65	66	71	82	64	63	69
		Lower leg length		(cm)	39.5	36	39	38.5	48	38.5	40	36.5	40	39.5	40	39	39.5	40	39	39	42.5
	Range of motion	From anatomical postion to maximal dorsiflexion angle (ROManat-max)		(°)	20.4	28.2	25.4	35.9	19.9	26.9	32.1	16.1	22.5	36.2	30	13.5	23.3	27.2	27.5	30.5	23.3
		From slack angle to maximal dorsiflexion angle (ROMslack-max)		(°)	31.1	46	46.4	45.8	32.4	60.1	49	35	43.5	48.1	52.5	31	44.9	48.3	48.4	49.2	36.9
	Muscle-tendon unit anatomical parameters of the medial gastrocnemius at slack angle	Fascicle length		(mm)	49.9	56.2	56.4	48	45.5	64	50.4	53.4	50.3	50.9	66.9	55.6	57.9	48.1	50	48.7	43.6
		Pennation angle		(°)	31.9	25	19.5	23.5	23.7	25	26.7	23.3	21.1	25.4	24.1	23.3	22.4	21.6	26.4	23.7	24.4
		Resolved fascicle length		(mm)	42.4	50.9	53.2	44	41.7	58	45.1	49.1	47	46	61	51.1	53.6	44.7	44.8	44.6	39.7
		Tendinous tissue length		(mm)	369.8	319.3	345.3	358.3	457.4	324.8	367.2	325.5	361.8	365.2	346.4	350.4	349.6	363.9	353.7	355.8	401.2
		Muscle-tendon unit length		(mm)	412.2	370.3	398.5	402.3	499.1	382.8	412.3	374.6	408.7	411.2	407.4	401.5	403.1	408.6	398.5	400.4	440.9
		Relative muscle length to muscle-tendon unit length			0.1	0.14	0.13	0.11	0.08	0.15	0.11	0.13	0.11	0.11	0.15	0.13	0.13	0.11	0.11	0.11	0.09
		Relative tendinous tissue length to muscle-tendon unit length			0.9	0.86	0.87	0.89	0.92	0.85	0.89	0.87	0.89	0.89	0.85	0.87	0.87	0.89	0.89	0.89	0.91
	Muscle-tendon unit anatomical parameters of the medial gastrocnemius at anatomical position	Fascicle length		(mm)	57.9	73.7	86.6	54.9	55.5	84.1	59.6	71.1	65	57.6	83	67.9	76.3	64	68.5	58.2	53.9
		Pennation angle		(°)	27.7	20	11.4	20.8	19.3	19.2	20.8	16.5	16.3	21.9	18.4	18	16.5	15.4	16.1	18	19.7
		Resolved fascicle length		(mm)	51.2	69.2	84.9	51.3	52.4	79.5	55.8	68.2	62.4	53.4	78.8	64.6	73.1	61.7	65.8	55.4	50.7
		Tendinous tissue length		(mm)	369.3	314.1	330.3	358.6	458.6	330.4	370.1	320.4	363.5	367.1	347.1	350.7	347.4	364.1	349.4	359.9	401.8
		Muscle-tendon unit length		(mm)	420.5	383.3	415.2	409.9	511	409.9	425.9	388.6	425.9	420.5	425.9	415.2	420.5	425.9	415.2	415.2	452.5
		Relative muscle length to muscle-tendon unit length			0.12	0.18	0.2	0.13	0.1	0.19	0.13	0.18	0.15	0.13	0.18	0.16	0.17	0.14	0.16	0.13	0.11
		Relative tendinous tissue length to muscle-tendon unit length			0.88	0.82	0.8	0.87	0.9	0.81	0.87	0.82	0.85	0.87	0.82	0.84	0.83	0.86	0.84	0.87	0.89
	Root mean square value of electromyography activity	The medial gastrocnemius		(%MVC)	1.08	0.55	2.98	0.49	0.96	0.82	1.32	1.14	3.15	1.87	0.67	1.31	0.29	0.71	0.68	0.72	1.38
		The lateral gastrocnemius		(%MVC)	1.37	0.49	4.22	0.46	0.79	0.56	1.19	1.21	0.3	0.6	0.22	0.49	0.3	0.65	0.68	1.34	1.13
		The soleus		(%MVC)	0.97	6.88	1.63	0.78	3.22	0.91	3.62	2.61	0.86	1.09	1.26	2.38	0.8	1.96	0.58	0.68	0.94
	MVC: maximal voluntary contraction, ROM: range of motion
